# Supplementary material
Source: publisher figshare collection journal article supplement (https://acs.figshare.com/ndownloader/files/4311208)
Supplement: Supplementary file 1 [file 4311208]

**"Tuning the vertical phase separation in polyfluorene:fullerene blend films by polymer functionalisation"**

Anselmo, Ana; Lindgren, Lars; Rysz, Jakub; Bernasik, Andrzej; Budkowski, Andrzej;  
Andersson, Mats; Svensson, Krister; van Stam, Jan; Moons, Ellen

**Figure S1.** Carbon K-edge NEXAFS spectra measured in partial (PEY) electron yield of (a) APFO-Green11:PCBM; (b); APFO-Green12:PCBM; and (c) APFO-Green13:PCBM with the corresponding best linear combination fits and residual plots (shifted, to improve clarity).

**Figure S2.** Carbon K-edge NEXAFS spectra measured in total (TEY) electron yield of (a) APFO-Green11:PCBM; (b); APFO-Green12:PCBM; and (c) APFO-Green13:PCBM with the corresponding best linear combination fits and residual plots (shifted, to improve clarity).

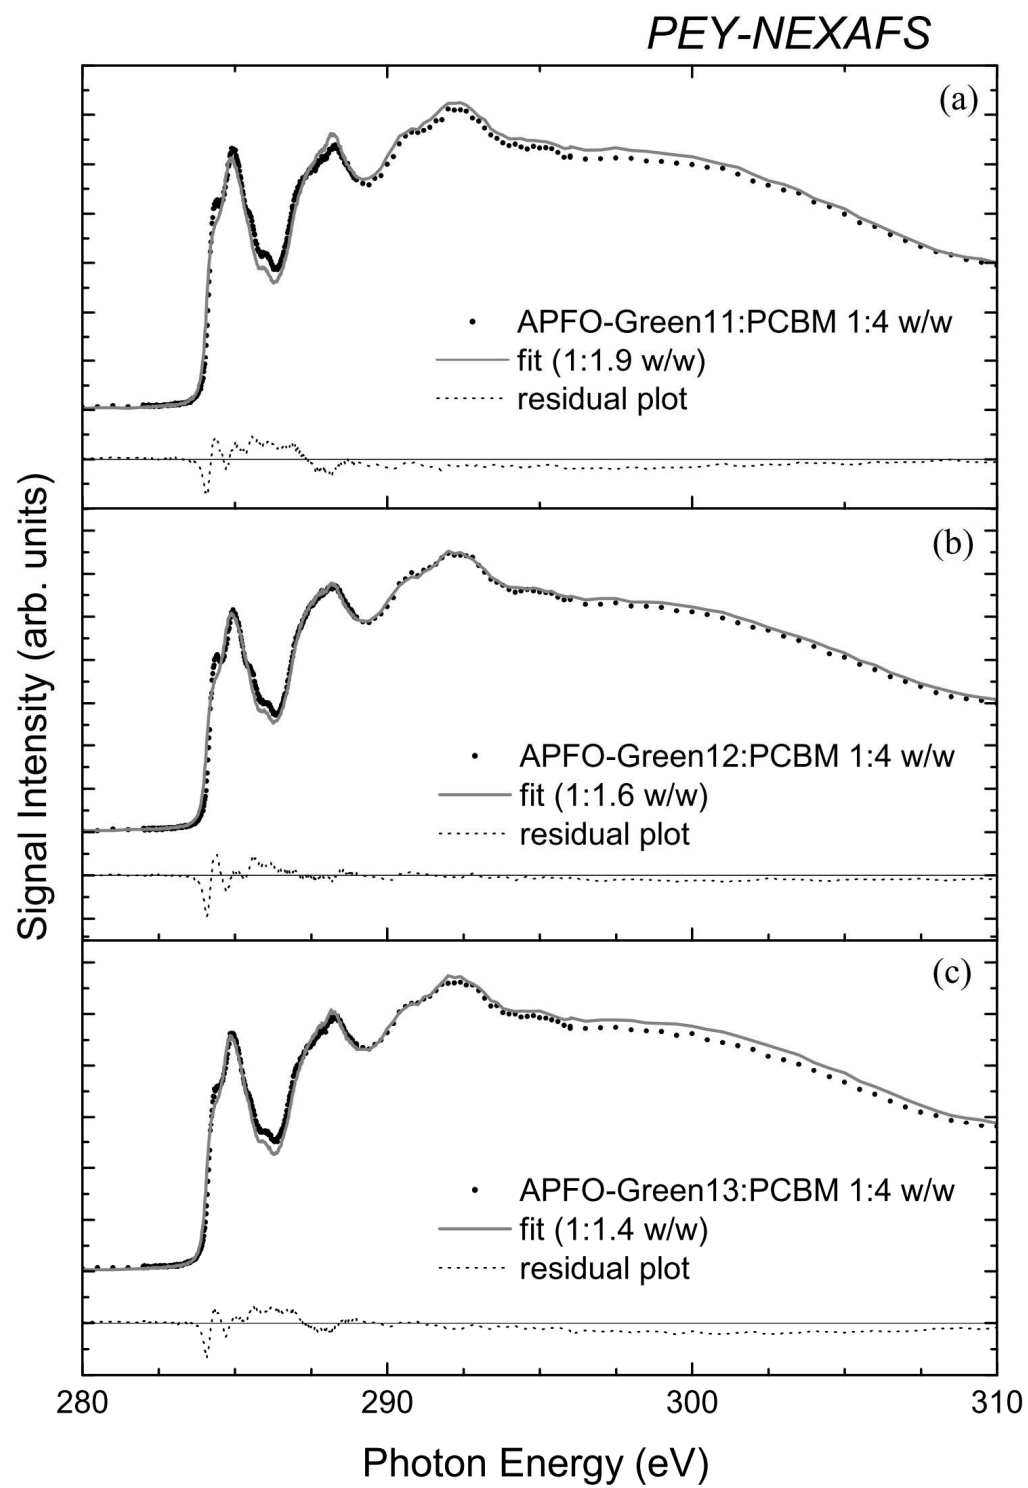

*Anselmo et al.* Supplementary material

Figure S1.

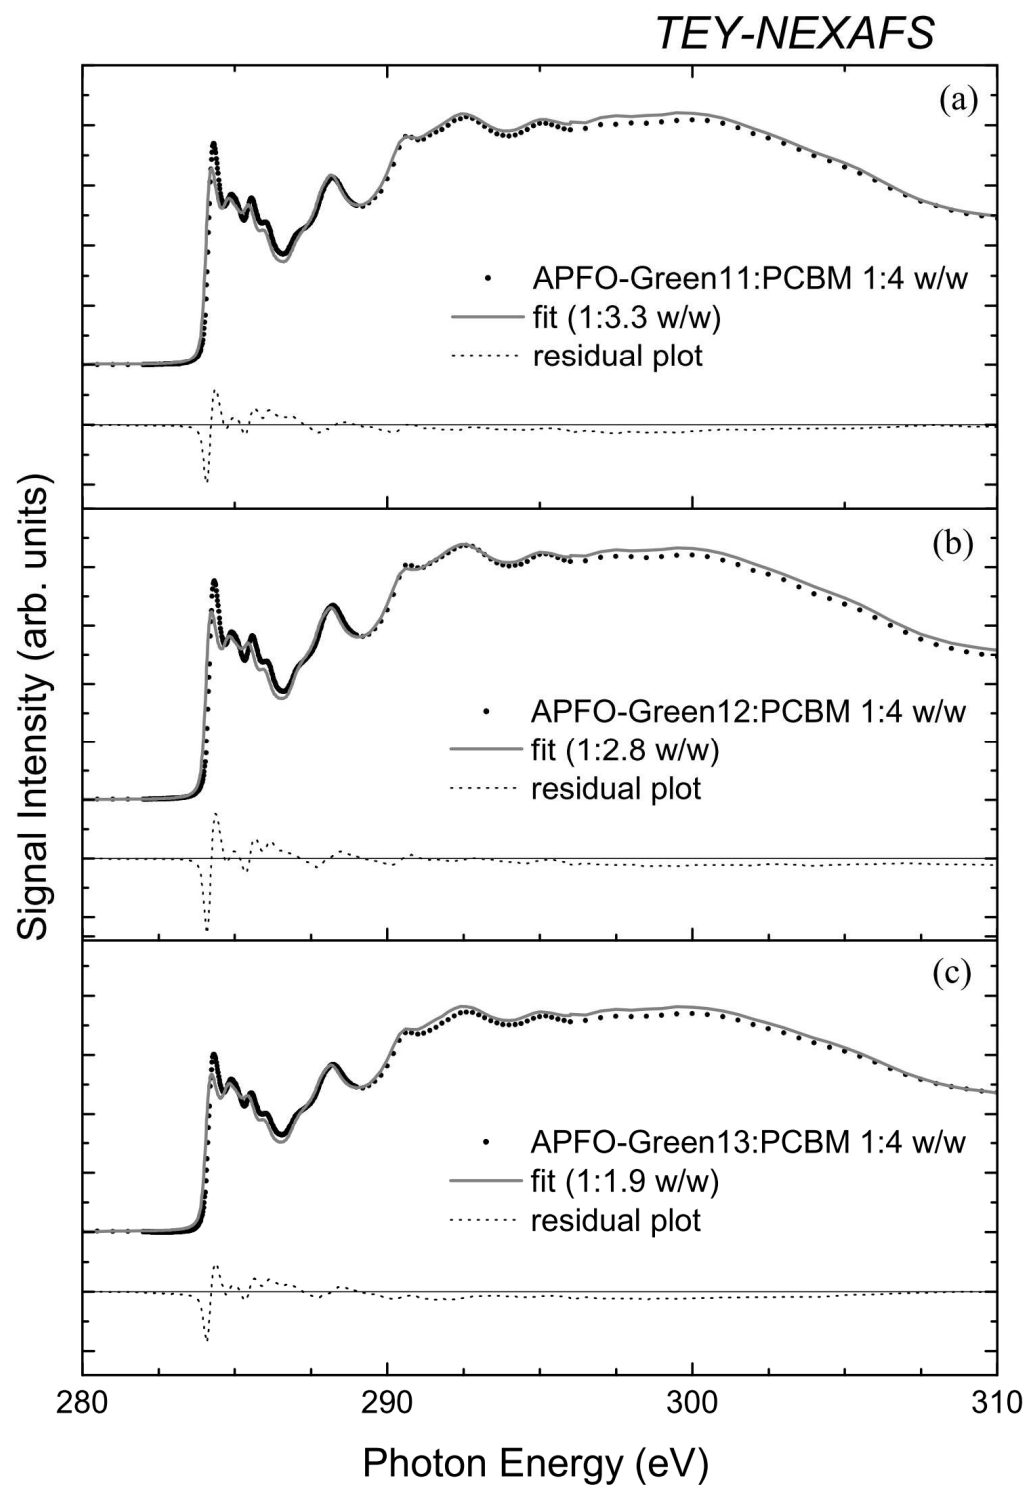

*Anselmo et al.* Supplementary material

Figure S2.
